# Supplementary material for: Competitive adsorption of three phenolic compounds to hydrophilic urea-formaldehyde macroporous foams derived from lignin-based Pickering HIPEs template
Source: Royal Society of Chemistry journal article supplement (doi:10.1039/c6ra20919j), 2016-01-01
Supplement: c6ra20919j1.pdf [file c6ra20919j1.pdf]

*Supporting information for*

**Competitive Adsorption of Three Phenolic Compounds to Hydrophilic Urea-Formaldehyde Macroporous Foams Derived from Lignin-based Pickering HIPEs Template**

Jianming Pan<sup>\*, a</sup>, Jialu Luo<sup>a</sup>, Jun Cao<sup>b</sup>, Jinxing Liu<sup>a</sup>, Wei Huang<sup>a</sup>, Wenli Zhang<sup>\*, a</sup>, Lili Yang<sup>c</sup>

<sup>a</sup> School of Chemistry and Chemical Engineering, Jiangsu University, Zhenjiang 212013, China

<sup>b</sup> Yancheng Entry-Exit Inspection and Quarantine Bureau, Yancheng 210001, China

<sup>c</sup> Key Laboratory of Functional Materials Physics and Chemistry (Ministry of Education), Jilin Normal University, Changchun 130103, China

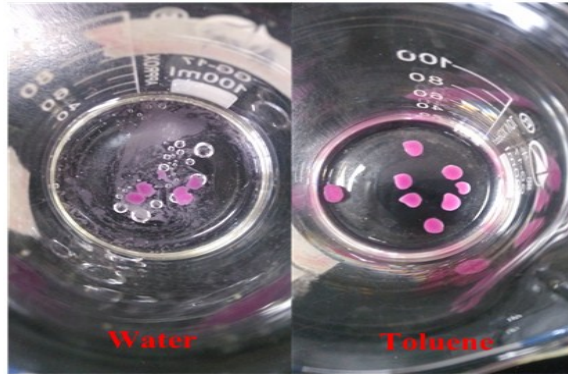

Fig. S1 Photos of Pickering HIPEs dispersing in water (a) and toluene (b).

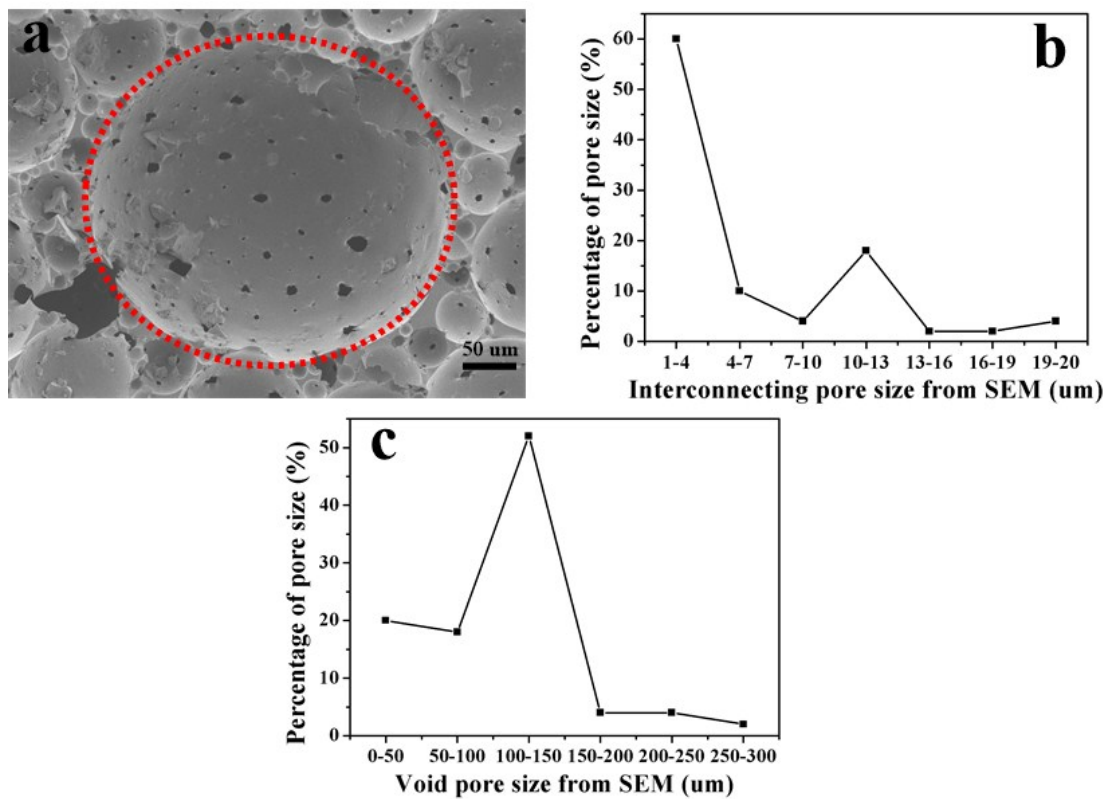

Fig. S2 Partial enlarged SEM image of UFMF11 (a), interconnecting (b) and void pore size distribution from SEM image of UFMF11 (c).
